# Supplementary material for: Factors Affecting the Vitamin C Dose-Concentration Relationship: Implications for Global Vitamin C Dietary Recommendations
Source: MDPI journal article supplement (doi:10.3390/nu15071657), 2023-03-29
Supplement: s1 [file s1]

(Supplemental Material)

# Factors Affecting the Vitamin C Dose-Concentration Relationship: Implications for Global Vitamin C Dietary Recommendations

Anitra C. Carr <sup>1,\*</sup> and Jens Lykkesfeldt <sup>2</sup>

<sup>1</sup> Nutrition in Medicine Research Group, Department of Pathology and Biomedical Science, University of Otago, Christchurch 8011, New Zealand

<sup>2</sup> Faculty of Health & Medical Sciences, University of Copenhagen, DK-1870 Frederiksberg C, Denmark

\* Correspondence: anitra.carr@otago.ac.nz

## 3. Results

### 3.3. Vitamin C dose-concentration relationship relative to smoking status

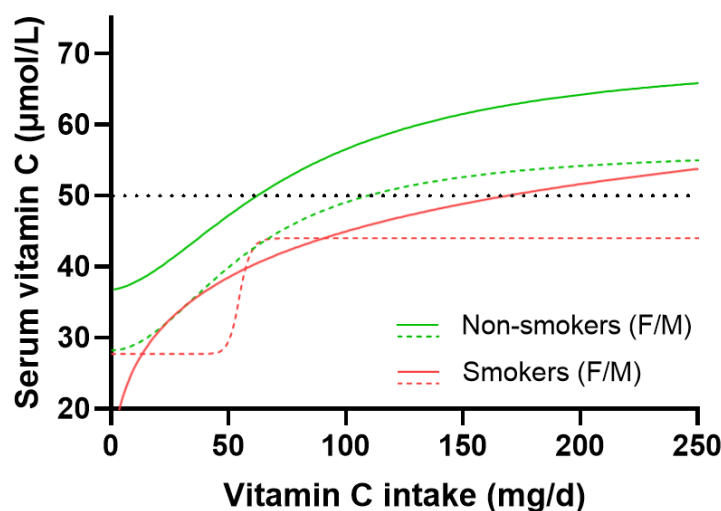

**Figure S1.** Vitamin C dose-response relationship relative to smoking status stratified by gender. Females are indicated by solid lines (non-smokers  $n = 1135$ , smokers  $n = 268$ ); males are indicated by dashed lines (non-smokers  $n = 980$ , smokers  $n = 413$ ). Sigmoidal (four parameter logistic) curves were fitted to the dose-concentration data. Dashed line indicates 50  $\mu\text{mol/L}$  serum vitamin C which is considered 'adequate'. F, female; M, male.

### 3.4. Vitamin C dose-concentration relationship relative to body weight

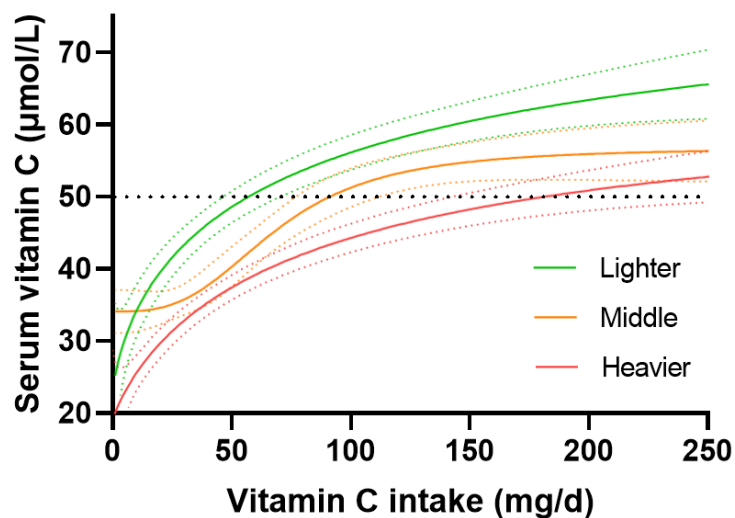

**Figure S2.** Vitamin C dose-response relationship relative to body weight. Lighter weight tertile 63 (57, 68) kg ( $n = 932$ ); middle weight tertile 80 (76, 85) kg ( $n = 943$ ); heavier weight tertile 105 (67, 118) kg ( $n = 930$ ). Sigmoidal (four parameter logistic) curves were fitted to the dose-concentration data with asymmetrical 95% confidence intervals indicated. Dashed line indicates 50  $\mu\text{mol/L}$  serum vitamin C which is considered 'adequate'.

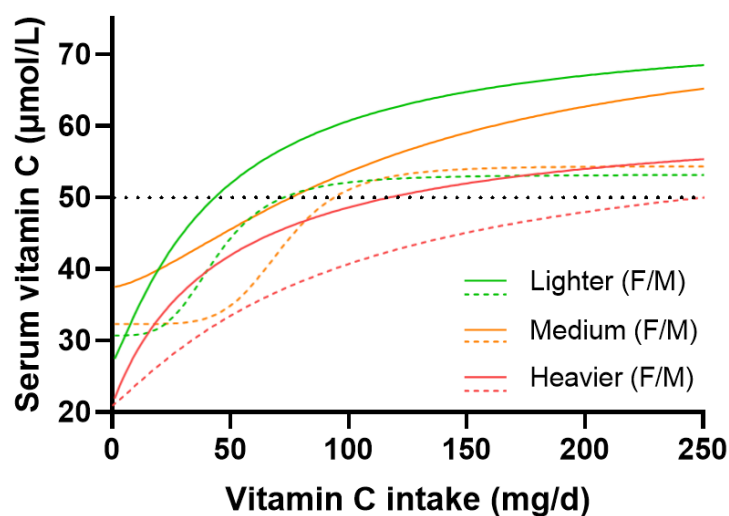

**Figure S3.** Vitamin C dose-response relationship relative to body weight stratified by gender. Female weight tertiles are indicated by solid lines (lighter 59 [34, 70] kg,  $n = 460$ ; medium 75 [71, 80] kg,  $n = 471$ ; heavier 100 [92, 114] kg,  $n = 461$ ); male weight tertiles are indicated by dashed lines (lighter 69 [63, 73] kg,  $n = 469$ ; medium 85 [80, 90] kg,  $n = 474$ ; heavier 108 [100, 120] kg,  $n = 470$ ). Sigmoidal (four parameter logistic) curves were fitted to the dose-concentration data. Dashed line indicates 50  $\mu\text{mol/L}$  serum vitamin C which is considered 'adequate'. F, female; M, male.

### Vitamin C dose-concentration relationship relative to BMI

Linear regression indicated an inverse correlation between BMI and vitamin C status ( $r = -0.152$ ,  $p < 0.0001$ ). Of note, the upper 95% CI of the linear regression indicated that only people with BMIs of  $<20 \text{ kg/m}^2$  were able to reach adequate serum vitamin C concentrations of  $50 \text{ } \mu\text{mol/L}$  in this cohort. Dose-concentration analyses indicated that in the lower BMI category ( $23 [21, 25] \text{ kg/m}^2$ ) vitamin C intakes of  $62 (51, 76) \text{ mg/day}$  were required to reach  $50 \text{ } \mu\text{mol/L}$  circulating concentrations compared with intakes of  $177 (140, \text{NA}) \text{ mg/day}$  for the higher BMI category ( $37 [34, 41] \text{ kg/m}^2$ ; Figure S4a). Additionally, the lower BMI tertile attained a higher plasma concentration of  $59 (55, 63) \text{ } \mu\text{mol/L}$  at an intake of  $200 \text{ mg/day}$  versus a value of  $51 (48, 54) \text{ } \mu\text{mol/L}$  for the higher BMI tertile. The middle BMI category ( $29 [27, 32] \text{ kg/m}^2$ ) required an intake of  $88 (76, 104) \text{ mg/day}$  to reach  $50 \text{ } \mu\text{mol/L}$  circulating concentrations and attained  $60 (57, 63) \text{ } \mu\text{mol/L}$  serum concentrations at an intake of  $200 \text{ mg/day}$  (Figure S4b). The difference between the 95% CIs of the lower and higher BMI groups was  $61 \text{ mg}$  and corresponded to a 1.8-fold increased requirement for vitamin C in the higher BMI group.

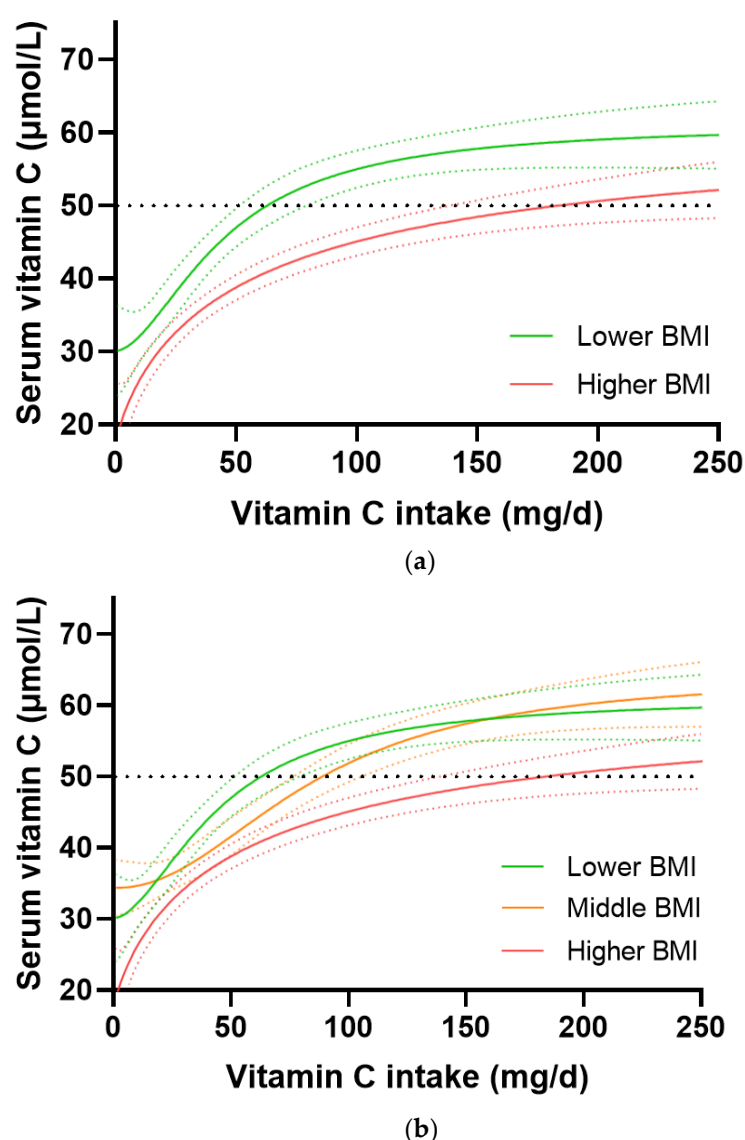

**Figure S4.** (a,b) Vitamin C dose-response relationship relative to BMI. Lower BMI tertile  $23 (21, 25) \text{ kg/m}^2$  ( $n = 930$ ); middle BMI tertile  $29 (28, 31) \text{ kg/m}^2$  ( $n = 948$ ); higher BMI tertile  $37 (34, 41) \text{ kg/m}^2$  ( $n = 925$ ). Sigmoidal (four parameter logistic) curves were fitted to the dose-concentration data with asymmetrical 95% confidence intervals indicated. Dashed line indicates  $50 \text{ } \mu\text{mol/L}$  serum vitamin C which is considered 'adequate'. BMI, body mass index.

Females of lower BMI (23 [21, 25] kg/m<sup>2</sup>) required 43 (36, 54) mg/day to reach 50 µmol/L vitamin C concentrations and achieved 65 (58, 71) µmol/L at 200 mg/day intakes versus higher BMI females (39 [36, 43] kg/m<sup>2</sup>) requiring 121 (90, NA) mg/day vitamin C to reach 50 µmol/L and achieving 54 (46, 62) µmol/L at an intake of 200 mg/day. Similarly, males of lower BMI (24 [22, 25] kg/m<sup>2</sup>) reached 50 µmol/L vitamin C concentrations at an intake of 106 (69, NA) mg/day and achieved 53 (47, 60) µmol/L at an intake of 200 mg/day relative to males of higher BMI (35 [33, 38] kg/m<sup>2</sup>) reaching 47 (43, 51) µmol/L concentrations at an intake of 200 mg/day.

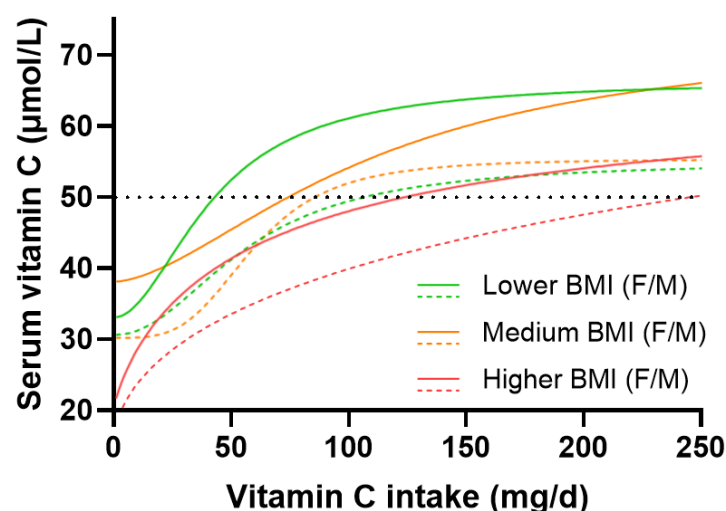

**Figure S5.** Vitamin C dose-response relationship relative to BMI stratified by gender. Female BMI tertiles are indicated by solid lines (lower 23 [21, 25] kg/m<sup>2</sup>,  $n = 464$ ; medium 30 [28, 31] kg/m<sup>2</sup>,  $n = 462$ ; higher 39 [36, 43] kg/m<sup>2</sup>,  $n = 466$ ); male BMI tertiles are indicated by dashed lines (lower 24 [22, 25] kg/m<sup>2</sup>,  $n = 469$ ; medium 28 [27, 30] kg/m<sup>2</sup>,  $n = 467$ ; higher 35 [33, 38] kg/m<sup>2</sup>,  $n = 475$ ). Sigmoidal (four parameter logistic) curves were fitted to the dose-concentration. Dashed line indicates 50 µmol/L serum vitamin C which is considered 'adequate'. BMI, body mass index; F, female; M, male.

### 3.5. Vitamin C dose-concentration relationship relative to age

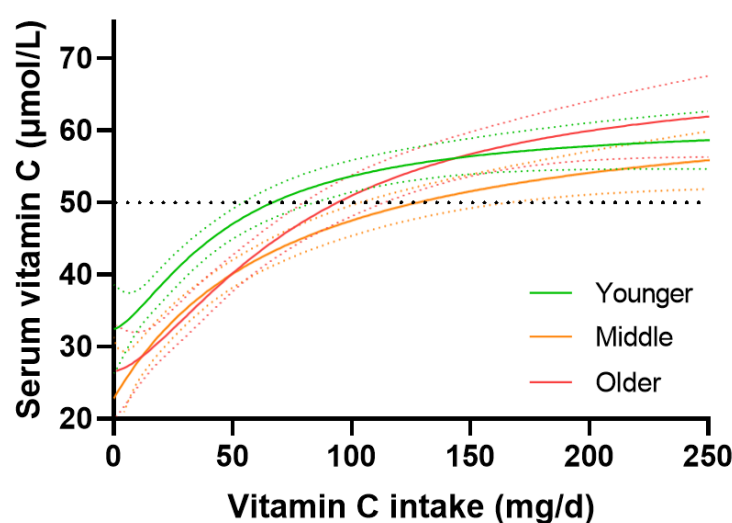

**Figure S6.** Vitamin C dose-response relationship relative to age. Younger age tertile 18-36 years ( $n = 942$ ); middle age tertile 37-58 years ( $n = 942$ ); older age tertile 59-80+ years ( $n = 944$ ). Sigmoidal (four parameter logistic) curves were fitted to the dose-concentration data with asymmetrical 95% confidence intervals indicated. Dashed line indicates 50 µmol/L serum vitamin C which is considered 'adequate'.

### 3.6. Vitamin C dose-response relationship relative to ethnicity

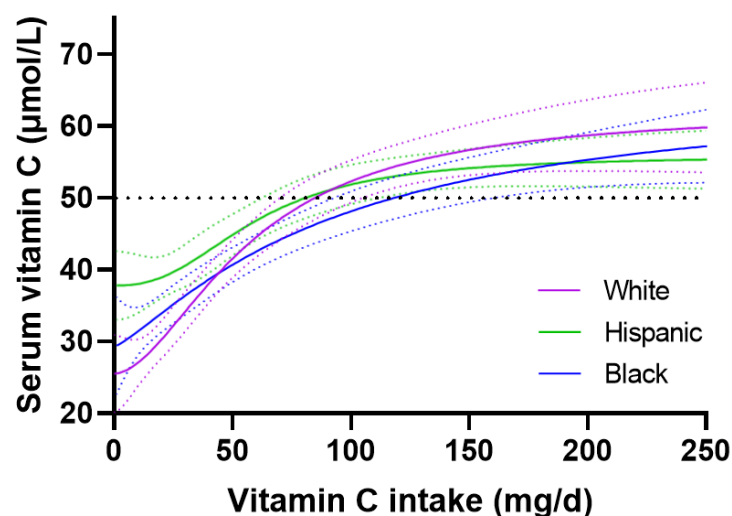

**Figure S7.** Vitamin C dose-response relationship relative to ethnicity. Non-Hispanic white ( $n = 940$ ); total Hispanic (Mexican American and other Hispanic,  $n = 680$ ); non-Hispanic black ( $n = 728$ ). Sigmoidal (four parameter logistic) curves were fitted to the dose-concentration data with asymmetrical 95% confidence intervals indicated. Dashed line indicates 50  $\mu\text{mol/L}$  serum vitamin C which is considered 'adequate'.

### 3.7. Vitamin C dose-response relationship relative to socioeconomic status

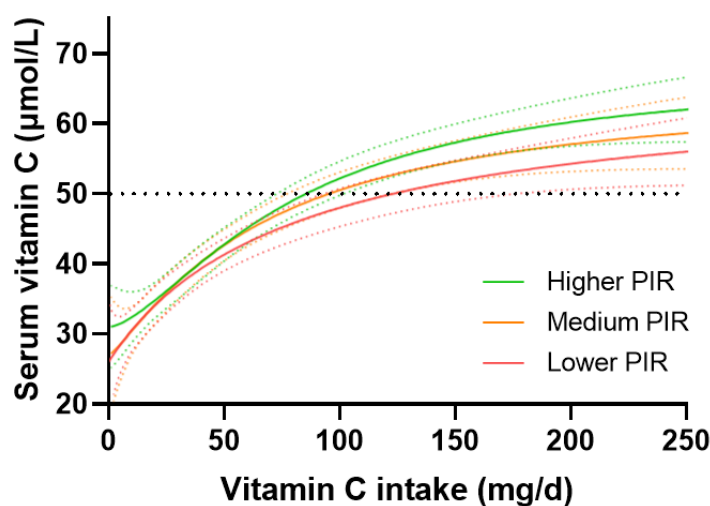

**Figure S8.** Vitamin C dose-response relationship relative to socioeconomic status. Higher poverty income ratio tertile (PIR  $>3.0$ ,  $n = 840$ ), medium poverty income ratio (PIR  $1.36 - 3.0$ ,  $n = 843$ ), and lower poverty-income ratio tertile (PIR  $\leq 1.35$ ,  $n = 843$ ). Sigmoidal (four parameter logistic) curves were fitted to the dose-concentration data with asymmetrical 95% confidence intervals indicated. Dashed line indicates 50  $\mu\text{mol/L}$  serum vitamin C which is considered 'adequate'. PIR, poverty income ratio.

#### 4. Discussion

**Table S1.** Summary of intake and concentration estimates from dose-concentration curves.

| Factor                        | Total (n = 2828)           |                                     | Females (n = 1403) |                        | Males (n = 1425) |                        |
|-------------------------------|----------------------------|-------------------------------------|--------------------|------------------------|------------------|------------------------|
|                               | Dose (mg/day) <sup>1</sup> | Concentration (μmol/L) <sup>2</sup> | Dose (mg/day)      | Concentration (μmol/L) | Dose (mg/day)    | Concentration (μmol/L) |
| Total cohort                  | 93 (83, 107)               | 57 (55, 59)                         | 72 (63, 84)        | 63 (60, 66)            | 127 (102, 174)   | 53 (50, 56)            |
| Smoking status:               |                            |                                     |                    |                        |                  |                        |
| Non-smokers                   | 76 (67, 85)                | 59 (56, 61)                         | 62 (52, 71)        | 65 (61, 67)            | 108 (87, 142)    | 54 (51, 57)            |
| Smokers                       | 236 (167, NA)              | 48 (45, 52)                         | 166 (103, NA)      | 52 (42, 61)            | NA               | 44 (40, 48)            |
| Weight tertiles: <sup>3</sup> |                            |                                     |                    |                        |                  |                        |
| Lighter                       | 56 (45, 70)                | 63 (60, 67)                         | 45 (32, 54)        | 67 (62, 72)            | 71 (51, NA)      | 53 (48, 58)            |
| Middle                        | 90 (76, 111)               | 56 (52, 59)                         | 76 (57, 100)       | 63 (57, 68)            | 93 (79, 116)     | 54 (50, 59)            |
| Heavier                       | 177 (140, NA)              | 51 (48, 54)                         | 116 (82, 154)      | 54 (48, 61)            | 243 (172, NA)    | 48 (44, 52)            |
| BMI tertiles: <sup>4</sup>    |                            |                                     |                    |                        |                  |                        |
| Lower                         | 62 (51, 76)                | 59 (55, 63)                         | 43 (36, 54)        | 65 (58, 71)            | 106 (69, NA)     | 53 (47, 60)            |
| Middle                        | 88 (76, 104)               | 60 (57, 63)                         | 76 (58, 110)       | 64 (58, 69)            | 86 (68, 112)     | 55 (51, 59)            |
| Higher                        | 178 (137, NA)              | 51 (48, 54)                         | 121 (90, NA)       | 54 (46, 62)            | 243 (185, NA)    | 47 (43, 51)            |

<sup>1</sup> Estimated doses of vitamin C required to reach 50 μmol/L serum vitamin C concentrations. <sup>2</sup> Estimated serum concentrations of vitamin C attained with an intake of 200 mg/day. <sup>3</sup> Weight tertiles for total cohort: lighter ≤72 kg; medium 72–91 kg; heavier ≥91 kg; Females: lighter ≤67 kg; medium 68–85 kg; heavier ≥85 kg; Males: lighter ≤77 kg; medium 77–94 kg; heavier ≥95 kg. <sup>4</sup> BMI tertiles for total cohort: lower ≤26 kg/m<sup>2</sup>; medium 26–32 kg/m<sup>2</sup>; higher ≥32 kg/m<sup>2</sup>; Females: lower ≤26 kg/m<sup>2</sup>; medium 26–33 kg/m<sup>2</sup>; higher ≥33 kg/m<sup>2</sup>; Males: lower ≤26 kg/m<sup>2</sup>; medium 26–31 kg/m<sup>2</sup>; higher ≥31 kg/m<sup>2</sup>. Data was estimated from sigmoidal (four parameter logistic) curves with asymmetrical 95% confidence intervals fitted to dose-concentration data. BMI, body mass index.
